# Supplementary material for: Protein–Protein Interactions Mediated by Intrinsically Disordered Protein Regions Are Enriched in Missense Mutations
Source: Biomolecules. 2020 Jul 24;10(8):1097. doi: 10.3390/biom10081097 (PMC7463635; doi:10.3390/biom10081097)
Supplement: Supplementary file 1 [file biomolecules-10-01097-s001.zip]

Archive with 7 entries (6 files):
- Table_S1_JG.xlsx
- __MACOSX/
- __MACOSX/._Table_S1_JG.xlsx
- Supplementary_Materials.pdf
- __MACOSX/._Supplementary_Materials.pdf
- Table_S2_JG.xlsx
- __MACOSX/._Table_S2_JG.xlsx
