# Supplementary material for: Protein–Protein Interactions Mediated by Intrinsically Disordered Protein Regions Are Enriched in Missense Mutations
Source: Biomolecules. 2020 Jul 24;10(8):1097. doi: 10.3390/biom10081097 (PMC7463635; doi:10.3390/biom10081097)
Supplement: Supplementary file 1 [file biomolecules-10-01097-s001.zip › Table_S1_JG.xlsx]

## Sheet: Residue and mutation numbers
Protein–Protein Interactions Mediated by Intrinsically Disordered Protein Regions Are Enriched in Missense Mutations. Biomolecules 2020
Table S1. Tabulated residues and mutations used in odds ratios calculations.
A	SwissVar
	Globular		MobiDB IDR-partner		MobiDB IDR
	Residues	Mutated Positions	Residues	Mutated Positions	Residues	Mutated Positions
External	431116	4617	59959	514	103102	1407
Buried	75858	1947	8495	272	14	0
Surface	77691	1063	9576	152	665	12
Rim	20182	401	1297	23	1291	31
Core	22053	698	1704	64	571	21
Total	626900	8726	81031	1025	105643	1471
Structure	195784	4109	21072	511	2541	64
Interface	42235	1099	3001	87	1862	52
B	COSMIC
	Globular		MobiDB IDR-partner		MobiDB IDR
	Residues	Mutated Positions	Residues	Mutated Positions	Residues	Mutated Positions
External	754085	19640	133776	6203	185189	9210
Buried	114670	3890	15336	1022	25	1
Surface	122355	4384	17909	1101	877	55
Rim	31958	1305	2518	156	2351	172
Core	34001	1299	3185	199	1047	81
Total	1057069	30518	172724	8681	189489	9519
Structure	302984	10878	38948	2478	4300	309
Interface	65959	2604	5703	355	3398	253
C	Cosmic Tumor Suppressor
	Globular		MobiDB IDR-partner		MobiDB IDR
	Residues	Mutated Positions	Residues	Mutated Positions	Residues	Mutated Positions
External	62708	6421	25014	2641	29486	3437
Buried	7195	1239	1784	418	8	1
Surface	7573	1086	2051	369	145	17
Rim	1959	324	317	54	309	27
Core	2183	436	458	92	145	16
Total	81618	9506	29624	3574	30093	3498
Structure	18910	3085	4610	933	607	61
Interface	4142	760	775	146	454	43
D	Cosmic Oncoprotein
	Globular		MobiDB IDR-partner		MobiDB IDR
	Residues	Mutated Positions	Residues	Mutated Positions	Residues	Mutated Positions
External	47135	4212	12686	1137	17241	1702
Buried	8521	1139	1795	286	1	0
Surface	9278	1361	1983	315	75	5
Rim	2413	374	407	55	299	35
Core	2511	354	482	58	117	17
Total	69858	7440	17353	1851	17733	1759
Structure	22723	3228	4667	714	492	57
Interface	4924	728	889	113	416	52
E	GnomAD (frequency 0.1 - 0.000001)
	Globular		MobiDB IDR-partner		MobiDB IDR
	Residues	Mutated Positions	Residues	Mutated Positions	Residues	Mutated Positions
External	1039686	380801	176508	60667	250811	82669
Buried	197765	55421	25172	5819	40	9
Surface	214620	74236	30011	9315	1545	561
Rim	64266	20779	4377	1088	3623	1268
Core	67589	18272	5474	1033	1626	465
Total	1583926	549509	241542	77922	257645	84972
Structure	544240	168708	65034	17255	6834	2303
Interface	131855	39051	9851	2121	5249	1733
F	GnomAD rare (frequency 0.000005 - 0.0000001)
	Globular		MobiDB IDR-partner		MobiDB IDR
	Residues	Mutated Positions	Residues	Mutated Positions	Residues	Mutated Positions
External	1039686	213233	176508	34965	250811	48384
Buried	197765	34227	25172	3753	40	6
Surface	214620	43705	30011	5619	1545	318
Rim	64266	12474	4377	685	3623	798
Core	67589	11259	5474	685	1626	301
Total	1583926	314898	241542	45707	257645	49807
Structure	544240	101665	65034	10742	6834	1423
Interface	131855	23733	9851	1370	5249	1099
G	GnomAD high-frequency (frequency 0.1 - 0.001)
	Globular		MobiDB IDR-partner		MobiDB IDR
	Residues	Mutated Positions	Residues	Mutated Positions	Residues	Mutated Positions
External	1039686	5928	176508	838	250811	1112
Buried	197765	532	25172	52	40	0
Surface	214620	1036	30011	120	1545	6
Rim	64266	242	4377	16	3623	12
Core	67589	242	5474	26	1626	4
Total	1583926	7980	241542	1052	257645	1134
Structure	544240	2052	65034	214	6834	22
Interface	131855	484	9851	42	5249	16
