# Supplementary material for: Protein–Protein Interactions Mediated by Intrinsically Disordered Protein Regions Are Enriched in Missense Mutations
Source: Biomolecules. 2020 Jul 24;10(8):1097. doi: 10.3390/biom10081097 (PMC7463635; doi:10.3390/biom10081097)
Supplement: Supplementary file 1 [file biomolecules-10-01097-s001.zip › Table_S2_JG.xlsx]

## Sheet: ORs for different mutation sets
Protein–Protein Interactions Mediated by Intrinsically Disordered Protein Regions Are Enriched in Missense Mutations. Biomolecules 2020
Table S2. Odds ratios and statistics.
A. SwissVar MobiDB
Category	Region	OR	p_value	Z_score	OR_SE
IDR	External	0.97979	0.589202	-0.543745	0.0367907
IDR-partner	External	0.674911	4.36125e-13	-7.23837	0.0366599
Globular	External	0.766898	2.64471e-47	-14.4971	0.0140397
IDR	Surface	1.30139	0.369768	0.900628	0.380651
IDR-partner	Surface	1.25895	0.00886152	2.62881	0.110279
Globular	Surface	0.982746	0.597243	-0.532072	0.0321465
IDR-partner	Buried	2.58189	3.25737e-45	13.7105	0.178621
Globular	Buried	1.86618	9.82735e-136	24.597	0.0473346
IDR	Core	2.70393	4.32355e-06	4.44283	0.605382
IDR-partner	Core	3.04603	7.33782e-19	8.48732	0.399749
Globular	Core	2.31554	2.57393e-102	21.0192	0.0924971
IDR	Rim	1.74233	0.00236655	3.02264	0.320044
IDR-partner	Rim	1.40915	0.107419	1.61236	0.299759
Globular	Rim	1.43612	2.46443e-12	7.01715	0.0740758
B. COSMIC MobiDB
Category	Region	OR	p_value	Z_score	OR_SE
IDR	External	0.989481	0.491881	-0.705168	0.0148379
IDR-partner	External	0.918821	1.24826e-06	-4.96871	0.0156562
Globular	External	0.899511	1.97139e-29	-11.4186	0.00834268
IDR	Surface	1.26503	0.100167	1.68315	0.176692
IDR-partner	Surface	1.23782	2.81985e-10	6.46518	0.0408492
Globular	Surface	1.25003	6.23125e-41	13.5734	0.0205522
IDR-partner	Buried	1.3492	1.13805e-17	8.75781	0.0461425
Globular	Buried	1.18117	2.44319e-21	9.61583	0.020453
IDR	Core	1.58532	9.62085e-05	3.96706	0.184139
IDR-partner	Core	1.25936	0.00235164	3.1148	0.0932381
Globular	Core	1.33616	3.37579e-23	10.0341	0.0385904
IDR	Rim	1.49238	8.86564e-07	5.01114	0.119236
IDR-partner	Rim	1.24805	0.00947584	2.657	0.104083
Globular	Rim	1.43206	6.46724e-35	12.4452	0.0413231
C. COSMIC Tumor Suppressor MobiDB
Category	Region	OR	p_value	Z_score	OR_SE
IDR	External	1.00316	0.907698	0.123344	0.025631
IDR-partner	External	0.860394	1.97427e-07	-5.52183	0.0234294
Globular	External	0.865375	1.4836e-15	-8.4534	0.0148019
IDR	Surface	1.00976	0.971845	0.0375434	0.261291
IDR-partner	Surface	1.59902	1.88039e-13	7.79857	0.0962437
Globular	Surface	1.26998	7.68899e-11	6.91652	0.0438837
IDR-partner	Buried	2.23038	4.41878e-39	13.6718	0.130864
Globular	Buried	1.57807	8.33528e-39	13.7923	0.0521973
IDR	Core	0.942997	0.835444	-0.220928	0.250517
IDR-partner	Core	1.83215	1.05699e-06	5.13199	0.216162
Globular	Core	1.89323	7.53721e-29	11.6826	0.103438
IDR	Rim	0.727939	0.138253	-1.57	0.147228
IDR-partner	Rim	1.49655	0.0114503	2.67949	0.225175
Globular	Rim	1.50327	4.39785e-10	6.59801	0.0928761
D. COSMIC Oncoprotein MobiDB
Category	Region	OR	p_value	Z_score	OR_SE
IDR	External	0.994682	0.887631	-0.14886	0.0356286
IDR-partner	External	0.824513	3.73741e-06	-4.86862	0.0326787
Globular	External	0.823257	8.06818e-20	-9.59167	0.0166929
IDR	Surface	0.648664	0.371787	-0.933668	0.300715
IDR-partner	Surface	1.5816	4.79113e-11	6.92782	0.104659
Globular	Surface	1.44223	1.07466e-27	11.514	0.0458687
IDR-partner	Buried	1.5873	2.04185e-10	6.69405	0.109557
Globular	Buried	1.29445	8.28429e-13	7.56518	0.0441608
IDR	Core	1.54382	0.11506	1.64778	0.406862
IDR-partner	Core	1.14563	0.365738	0.956449	0.162843
Globular	Core	1.37686	2.31102e-07	5.45352	0.080742
IDR	Rim	1.20396	0.331485	1.02193	0.218678
IDR-partner	Rim	1.30858	0.0831121	1.82878	0.192444
Globular	Rim	1.53883	1.0614e-12	7.48655	0.0885954
E. gnomAD MobiDB
Category	Region	OR	p_value	Z_score	OR_SE
IDR	External	0.999114	0.903205	-0.148543	0.00596159
IDR-partner	External	1.09968	1.19466e-31	14.3148	0.00729951
Globular	External	1.08795	5.80313e-146	32.0207	0.00286408
IDR	Surface	1.15855	0.023087	2.77322	0.0614837
IDR-partner	Surface	0.945089	0.000429235	-4.27387	0.0124887
Globular	Surface	0.995446	0.44553	-0.943929	0.00481331
IDR-partner	Buried	0.631359	5.07274e-134	-29.5337	0.00983112
Globular	Buried	0.732919	0	-58.8727	0.00386822
IDR	Core	0.813897	0.00214924	-3.7413	0.044797
IDR-partner	Core	0.488423	2.9629e-67	-20.5816	0.0170051
Globular	Core	0.697445	1.63311e-242	-40.8539	0.00615146
IDR	Rim	1.09415	0.0357419	2.5647	0.0383863
IDR-partner	Rim	0.69461	1.0947e-17	-10.3396	0.0244805
Globular	Rim	0.899469	2.04549e-23	-12.3243	0.00773268
F. gnomAD rare MobiDB
Category	Region	OR	p_value	Z_score	OR_SE
IDR	External	0.997397	0.741768	-0.366832	0.00708762
IDR-partner	External	1.05841	1.17038e-10	7.17168	0.00837747
Globular	External	1.03977	1.27669e-28	12.4181	0.0032655
IDR	Surface	1.08148	0.264971	1.24086	0.0682663
IDR-partner	Surface	0.987005	0.452578	-0.834067	0.015479
Globular	Surface	1.03051	2.56243e-06	5.25605	0.00589243
IDR-partner	Buried	0.750736	5.6341e-45	-15.5457	0.0138454
Globular	Buried	0.843435	2.72044e-131	-27.1629	0.00528714
IDR	Core	0.947949	0.453415	-0.834623	0.0607122
IDR-partner	Core	0.612849	2.75978e-27	-11.8907	0.0252361
Globular	Core	0.805492	4.01789e-76	-20.5737	0.00846856
IDR	Rim	1.17874	0.000252927	4.0707	0.0476189
IDR-partner	Rim	0.794944	7.77405e-07	-5.47369	0.0333279
Globular	Rim	0.970609	0.0086438	-2.93315	0.00987155
G.gnomAD high frequency MobiDB
Category	Region	OR	p_value	Z_score	OR_SE
IDR	External	1.00735	0.862822	0.173166	0.0426077
IDR-partner	External	1.09051	0.0624236	1.86693	0.0506086
Globular	External	1.13247	5.16065e-13	7.23562	0.0194708
IDR	Surface	0.881872	0.759575	-0.306513	0.361677
IDR-partner	Surface	0.917745	0.374866	-0.889046	0.0886065
Globular	Surface	0.957921	0.195153	-1.29864	0.0317111
IDR-partner	Buried	0.473222	7.74034e-08	-5.26096	0.0672996
Globular	Buried	0.532685	4.87979e-46	-14.0457	0.0238861
IDR	Core	0.55783	0.238834	-1.16391	0.279752
IDR-partner	Core	1.09098	0.662281	0.437585	0.217102
Globular	Core	0.709636	1.44205e-07	-5.24723	0.0463878
IDR	Rim	0.751704	0.325585	-0.981874	0.218507
IDR-partner	Rim	0.838716	0.486216	-0.696959	0.211656
Globular	Rim	0.746468	7.55345e-06	-4.47275	0.0487998
